# Supplementary material for: Nurses’ Experiences of Blood Sample Collection from Children: A Qualitative Study from Swedish Paediatric Hospital Care
Source: Research Square preprint supplement (doi:10.21203/rs.3.rs-144185/v1), 2021-01-15
Supplement: Supplementary file 1 [file 8be771c86ebfb5ce02e9ed73.docx]

Nurses’ experiences of blood sample collection from children:
A qualitative study from Swedish paediatric hospital care

**Supplementary file: Interview guide:**

These questions were used during the focus group interviews with the nurses. The questions was not following a certain strict order, even though we planned the discussions around the several steps and aspects around the blood sampling process following the question areas of; general aspects of blood sampling, preparations of blood sampling, during blood sampling and the aspects after a blood sampling been done. We also asked the participants about their age, years/months they had worked, as well as working place eg department, which we presented in a table in the manuscript.

-----------------------------------------------------------------------------------------------------------------

General introduction question:

- *How do you experience working with sick children?*

Questions about blood sampling in children:

- *When it comes to blood sampling on children, how do you experience it?*

Probing question

Can you tell me more?

How, Why… Can you describe further?

"Concerning preparation of the blood sampling procedure"

- How are your experiences around preparations for blood sampling?

- Is there any blood sampling instructions/guidelines which you know or use?

- Do you feel that you have received sufficient training in blood sampling on children?

- When you receive a prescription to take blood samples from children. What do you think then?

- How do you experience taking blood samples with the different methods example capillary, venous?
- How do you experience taking blood samples from different ages?

- How do you experience the collaboration with parents and relatives?

- Do you feel stressed in connection with sampling?

- Do different blood analyses play a role in connection with preparation a blood sampling?

- Is there anything you need to take into account when preparing the child and blood sample?

------------------------------------------------------------------------------------------------------------

"During blood sampling"

- Discuss your experiences during the actual blood sampling?

- Do you feel that it is possible to get blood out or hit the vessels?

- Is it common for things to go wrong? What is most often going wrong?

- What is the difference when things are going well and not?

- How do you experience taking blood samples from children with anxiety / fear?

- How do you experience getting to a good situation such as position, diversion and interaction?

- Do you feel there is a difference between taking different blood analyses? Are there any that are particularly difficult?

-----------------------------------------------------------------------------------------------------------------

"After sampling"

- What are your experiences/feelings after a sampling?

- What are your experiences of handle the blood samples after completion of sampling?
For example, how should blood samples be transported, mixed, etc?

- What do you know about pre-analytical errors?

- What is your experiences about pre-analytical errors? Any training?

- What feedback do you get and the child as well as colleagues?

"Ending questions"

- Do you feel that there is a question that has not been asked in this interview?
